# Supplementary material
Source: Research Square preprint supplement (doi:10.21203/rs.3.rs-9262189/v1)
Supplement: Supplementary file 1 [file e6062c0dec4a898bb9a44db0.docx]

Supplementary document 1A top differentially expressed genes in young whole seedlings

| Group seedlings | Ensembl id | Symbol | Log2FC | adjPVal | Description |
| --- | --- | --- | --- | --- | --- |
| Downregulated | AT5G24240 | AT5G24240 | -5.55 | 1E-12 | phosphatidylinositol 4-kinase gamma-like protein |
|  | AT3G11170 | FAD7 | -4.04 | 1.2E-54 | fatty acid desaturase 7 |
| AT1G21890 | UMAMIT19 | -3.74 | 4.3E-10 | nodulin MtN21 /EamA-like transporter family protein |
| AT5G53340 | AT5G53340 | -3.65 | 3.1E-17 | Galactosyltransferase family protein |
| AT1G65300 | AGL38 | -3.57 | 3.7E-08 | AGAMOUS-like 38 |
| AT1G07430 | HAI2 | -3.15 | 7.4E-14 | highly ABA-induced PP2C protein 2 |
| AT5G43840 | HSFA6A | -2.92 | 8.8E-08 | heat shock transcription factor A6A |
| AT4G01390 | AT4G01390 | -2.86 | 2.7E-30 | TRAF-like family protein |
| AT3G06655 | AT3G06655 | -2.85 | 9E-40 | ncRNA |
| AT1G56600 | GolS2 | -2.6 | 6.1E-50 | galactinol synthase 2 |
| AT4G32120 | AT4G32120 | -2.48 | 8.8E-64 | Galactosyltransferase family protein |
| Upregulated | AT1G76750 | EC1.1 | 6.476 | 2E-06 | egg cell-secreted-like protein (DUF1278) |
|  | AT5G42600 | MRN1 | 6.416 | 5.3E-12 | marneral synthase |
| AT1G58430 | RXF26 | 5.867 | 3.9E-05 | GDSL-like Lipase/Acylhydrolase family protein |
| AT5G04120 | AT5G04120 | 5.227 | 4.1E-06 | Phosphoglycerate mutase family protein |
| AT2G28860 | CYP710A4 | 5.223 | 1.5E-05 | cytochrome P450, family 710, subfamily A, polypeptide 4 |
| AT4G01630 | EXPA17 | 4.154 | 6E-05 | expansin A17 |
| AT2G05995 | AT2G05995 | 4.114 | 2.4E-09 | ncRNA |
| AT1G65570 | AT1G65570 | 4.112 | 6.4E-08 | Pectin lyase-like superfamily protein |
| AT1G43800 | FTM1 | 3.471 | 6.9E-15 | Plant stearoyl-acyl-carrier-protein desaturase family protein |
| AT2G20870 | AT2G20870 | 3.369 | 1.8E-06 | cell wall protein |

Supplementary document 1B top differentially expressed genes in young flowers

| Group buds | Ensembl id | Symbol | Log2FC | adjPVal | Description |
| --- | --- | --- | --- | --- | --- |
| Downregulated | AT1G14900 | HMGA | -11.12 | 8.23E-85 | high mobility group A |
|  | AT1G14890 | AT1G14890 | -10.62 | 3.55E-43 | Plant invertase/pectin methylesterase inhibitor superfamily protein |
| AT1G68050 | FKF1 | -6.336 | 1.14E-91 | flavin-binding, kelch repeat, f box 1 |
| AT2G40080 | ELF4 | -6.124 | 4.418E-31 | EARLY FLOWERING-like protein (DUF1313) |
| AT5G24470 | PRR5 | -5.949 | 6.70E-101 | two-component response regulator-like protein |
| AT4G04330 | RbcX1 | -5.285 | 8.78E-51 | Chaperonin-like RbcX protein |
| AT2G15890 | MEE14 | -4.721 | 4.35E-40 | maternal effect embryo arrest 14 |
| AT3G11170 | FAD7 | -4.43 | 0 | fatty acid desaturase 7 |
| AT5G23240 | AT5G23240 | -4.327 | 2.67E-69 | DNAJ heat shock N-terminal domain-containing protein |
| AT5G53340 | AT5G53340 | -4.321 | 2.76E-39 | Galactosyltransferase family protein |
| AT2G21660 | GRP7 | -4.31 | 5.58E-42 | cold, circadian rhythm, and rna binding 2 |
| AT2G42530 | COR15B | -4.25 | 2.47E-61 | cold regulated 15b |
| Upregulated | AT1G14880 | PCR1 | 11.001 | 3.646E-25 | PLANT CADMIUM RESISTANCE 1 |
|  | AT3G47480 | AT3G47480 | 8.0534 | 8.43E-40 | Calcium-binding EF-hand family protein |
| AT1G21240 | WAK3 | 7.6209 | 2.425E-16 | wall associated kinase 3 |
| AT4G10500 | AT4G10500 | 7.5918 | 1.163E-27 | 2-oxoglutarate (2OG) and Fe(II)-dependent oxygenase superfamily protein |
| AT3G15536 | AT3G15536 | 7.3484 | 3.492E-19 | ncRNA |
| AT4G23150 | CRK7 | 7.1122 | 4.486E-37 | cysteine-rich RLK (RECEPTOR-like protein kinase) 7 |
| AT2G43570 | CHI | 6.7185 | 4.422E-97 | chitinase |
| AT2G14610 | PR1 | 6.6306 | 1.927E-64 | pathosis-related protein 1 |
| AT1G02920 | GSTF7 | 6.2213 | 1.236E-44 | glutathione S-transferase 7 |
| AT3G45860 | CRK4 | 5.9249 | 1.041E-49 | cysteine-rich RLK (RECEPTOR-like protein kinase) 4 |
| AT4G11890 | ARCK1 | 5.8916 | 7.986E-18 | Protein kinase superfamily protein |

Supplementary document 1C top differentially expressed genes in young siliques

| Group YS | Ensembl id | Symbol | Log2FC | adjPval | Description |
| --- | --- | --- | --- | --- | --- |
| Downregulated | AT1G14890 | AT1G14890 | -13.05 | 2.5E-34 | Plant invertase/pectin methylesterase inhibitor superfamily protein |
|  | AT1G14900 | HMGA | -12.86 | 1.57E-29 | high mobility group A |
| AT4G11485 | LCR11 | -4.833 | 8.19E-12 | low-molecular-weight cysteine-rich 11 |
| AT4G12370 | AT4G12370 | -4.755 | 7.17E-11 | F-box/kelch-repeat protein |
| AT5G38760 | AT5G38760 | -4.736 | 5.4E-10 | Late embryosis abundant protein (LEA) family protein |
| AT5G53340 | AT5G53340 | -4.718 | 5.28E-28 | Galactosyltransferase family protein |
| AT3G28980 | AT3G28980 | -4.51 | 1.59E-09 | mediator of RNA polymerase II transcription subunit-like protein, putative (DUF1216) |
| AT2G19000 | AT2G19000 | -4.371 | 1.24E-11 | hypothetical protein |
| AT1G28306 | AT1G28306 | -4.235 | 3.53E-11 | Plant self-incompatibility protein S1 family |
| AT3G28830 | AT3G28830 | -4.158 | 2.39E-09 | mucin-like protein, putative (DUF1216) |
| AT3G11170 | FAD7 | -3.968 | 6.21E-45 | fatty acid desaturase 7 |
| Upregulated | AT1G62220 | AT1G62220 | 27.33 | 2.17E-14 | transmembrane protein |
|  | AT5G05020 | AT5G05020 | 25.062 | 3.29E-12 | Pollen Ole e 1 allergen and extensin family protein |
| AT1G14950 | AT1G14950 | 23.425 | 9.16E-11 | Polyketide cyclase/dehydrase and lipid transport superfamily protein |
| AT2G21490 | LEA | 23.378 | 1E-10 | dehydrin LEA |
| AT1G08483 | AT1G08483 | 23.233 | 1.33E-10 | ncRNA |
| AT1G62060 | AT1G62060 | 14.482 | 1.81E-14 | transmembrane protein |
| AT3G21520 | DMP1 | 11.516 | 1.41E-20 | transmembrane protein, putative (DUF679 domain membrane protein 1) |
| AT1G28700 | AT1G28700 | 11.322 | 1.57E-10 | Nucleotide-diphospho-sugar transferase family protein |
| AT1G50650 | AT1G50650 | 10.371 | 4.38E-10 | Stigma-specific Stig1 family protein |
| AT4G23560 | GH9B15 | 10.08 | 3.74E-15 | glycosyl hydrolase 9B15 |
| AT1G56385 | AT1G56385 | 9.8956 | 9.67E-20 | Plant self-incompatibility protein S1 family |
